# Supplementary material for: The effect and mechanism of a microbial agent used for corrosion control in circulating cooling water
Source: Royal Society of Chemistry journal article supplement (doi:10.1039/d3ew00629h), 2023-11-16
Supplement: d3ew00629h1.pdf [file d3ew00629h1.pdf]

## Supplementary Material

### The effect and mechanism of a microbial agent used for corrosion control in circulating cooling water

Yu Wang<sup>a</sup>, Hongfeng Liao<sup>b</sup>, Li Gan<sup>b</sup>, Zhengxiu Liu<sup>c</sup>, Ziqiang Tang<sup>c</sup>, Xiaoran Zhao<sup>c</sup>, Yubin Zeng<sup>a,\*</sup>,  
Chunsong Ye<sup>a,\*</sup>

<sup>a</sup>*Department of Energy Chemistry Engineering, School of Power and Mechanical Engineering,  
Wuhan University, Wuhan 430072, China*

<sup>b</sup>*Jingneng Shiyan Thermal Power Co., Ltd., Shiyan 442000, China*

<sup>c</sup>*Beijing Jingneng Energy Technology Research Co., Ltd., Beijing 100022, China*

---

\*Corresponding authors.

E-mail addresses: zengyubin@whu.edu.cn (Y. Zeng); csye@whu.edu.cn (C. Ye).

## Supplementary figures

### 1. Fig. S1

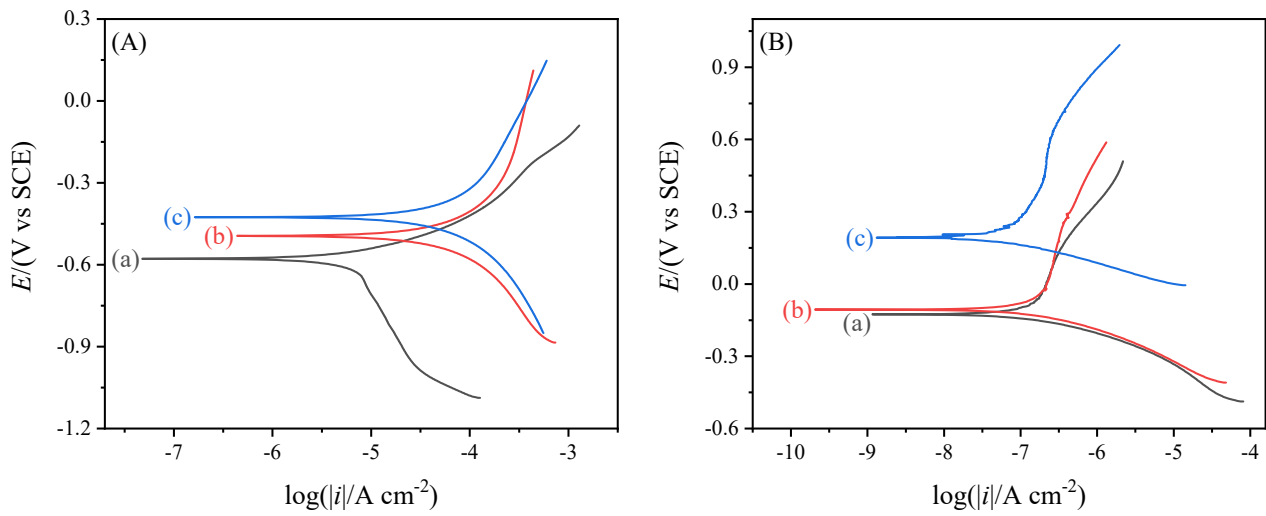

**Fig. S1** Potentiodynamic polarization curves of different electrodes. (A) Q235B electrode; (B) 316L electrode; (a) new electrode at 0 d; (b) without microbial agent after 30 d; (c) with microbial agent after 30 d.

### 2. Fig. S2

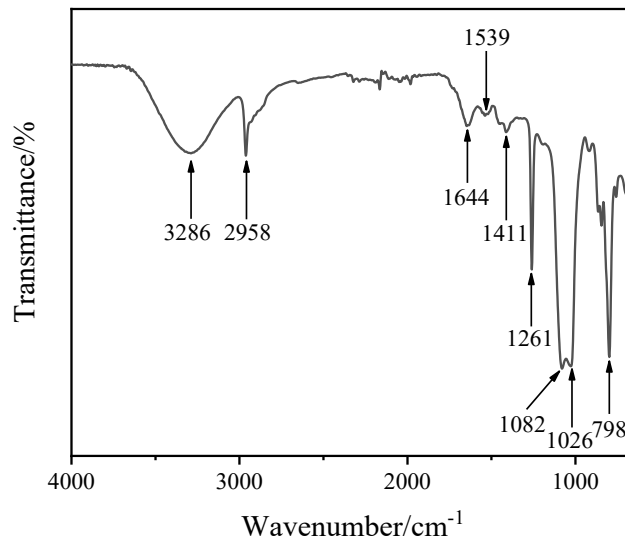

**Fig. S2** FTIR spectrum of the biofilm on the coupon surface.

## Supplementary tables

### 1. Table S1

**Table S1** Water quality index of circulating cooling water.

| Index                                            | Value     | Index                                                | Value       |
|--------------------------------------------------|-----------|------------------------------------------------------|-------------|
| pH/(25°C)                                        | 7.61-7.80 | NH <sub>3</sub> -N/(mg L <sup>-1</sup> )             | 0.17-0.28   |
| Electric conductivity/<br>(ms cm <sup>-1</sup> ) | 0.63-0.67 | COD/(mg L <sup>-1</sup> )                            | 12.36-19.30 |
| Suspended solids/(mg L <sup>-1</sup> )           | 2.50-6.20 | TP/(mg L <sup>-1</sup> )                             | 0.33-0.51   |
| Turbidity/(NTU)                                  | 0.21-1.47 | Ca <sup>2+</sup> /(mg L <sup>-1</sup> )              | 47.34-65.33 |
| Total hardness/(mmol L <sup>-1</sup> )           | 1.57-2.65 | Cl <sup>-</sup> /(mg L <sup>-1</sup> )               | 44.75-60.73 |
| Total alkalinity/(mmol L <sup>-1</sup> )         | 1.54-2.49 | SO <sub>4</sub> <sup>2-</sup> /(mg L <sup>-1</sup> ) | 42.16-64.29 |

### 2. Table S2

**Table S2** Corrosion rate of the coupon under different conditions.

| Type                                | Corrosion weight loss/(g) | Corrosion rate/<br>(mm a <sup>-1</sup> ) | Average corrosion rate/(mm a <sup>-1</sup> ) |
|-------------------------------------|---------------------------|------------------------------------------|----------------------------------------------|
| Q235B<br>without microbial<br>agent | 0.5794                    | 0.7319                                   | 0.7261 ± 0.0167                              |
|                                     | 0.5852                    | 0.7392                                   |                                              |
|                                     | 0.5599                    | 0.7072                                   |                                              |
| Q235B<br>with microbial agent       | 0.5230                    | 0.6606                                   | 0.6606 ± 0.0098                              |
|                                     | 0.5307                    | 0.6704                                   |                                              |
|                                     | 0.5152                    | 0.6508                                   |                                              |
| 316L<br>without microbial<br>agent  | 0.0005                    | 0.0006                                   | 0.0006 ± 0.0001                              |
|                                     | 0.0004                    | 0.0005                                   |                                              |
|                                     | 0.0005                    | 0.0006                                   |                                              |
| 316L<br>with microbial agent        | 0.0003                    | 0.0004                                   | 0.0005 ± 0.0002                              |
|                                     | 0.0006                    | 0.0007                                   |                                              |
|                                     | 0.0004                    | 0.0005                                   |                                              |

### 3. Table S3

**Table S3** Surface roughness parameters of the coupon at different times.

| Time/(d) | $S_a/(\mu\text{m})$ | $S_q/(\mu\text{m})$ |
|----------|---------------------|---------------------|
| 0        | 0.27                | 0.35                |
| 5        | 0.35                | 0.53                |
| 10       | 0.45                | 0.75                |
| 15       | 0.53                | 0.89                |
| 20       | 0.76                | 1.28                |
| 25       | 0.72                | 0.94                |
| 30       | 0.78                | 1.20                |
